# Supplementary material for: Analyzing Workers’ Compensation Claims and Payments Made Using Data from a Large Insurance Provider
Source: MDPI journal article supplement (doi:10.3390/ijerph17197157), 2020-09-30
Supplement: s1 [file s1]

**Table S1: Log-gamma regression models estimating the mean payments and burden associated with specific nature of injury categories for those claims that resulted in a payment, stratified by medical, and death and disability claims**

| Nature of injury  | Medical claims    |                |        |                   | Disability and death related claims |                |       |                   |
|-------------------|-------------------|----------------|--------|-------------------|-------------------------------------|----------------|-------|-------------------|
|                   | Mean payment (\$) | 95% CI (\$)    | n      | Burden (\$)       | Mean payment (\$)                   | 95% CI (\$)    | n     | Burden (\$)       |
| Contusion         | 673               | (645, 702)     | 23,139 | <b>1,557,0157</b> | 3,508                               | (3,059, 4,024) | 3,426 | <b>12,019,173</b> |
| Fracture          | 1,307             | (1,160, 1,472) | 1,231  | 1,608,348         | 6,111                               | (5,175, 7,216) | 732   | <b>4,473,147</b>  |
| Laceration        | 621               | (597, 647)     | 13,886 | <b>8,625,843</b>  | 2,437                               | (2,142, 2,773) | 1,399 | 3,409,636         |
| Multiple injuries | 924               | (864, 987)     | 3,033  | 2,802,090         | 4,586                               | (3,802, 5,533) | 822   | <b>3,770,007</b>  |
| Puncture          | 558               | (534, 584)     | 6,522  | <b>3,641,214</b>  | 3,253                               | (2,258, 4,687) | 407   | 1,323,946         |
| Sprain            | 830               | (798, 863)     | 9,178  | <b>7,618,292</b>  | 4,230                               | (3,694, 4,844) | 2,901 | <b>12,271,059</b> |
| Strain            | 862               | (828, 896)     | 29,219 | <b>25,173,196</b> | 4,603                               | (4,177, 5,073) | 9,931 | <b>45,717,300</b> |

The estimates are from GEE models accounting for correlations within claims nested within each client and adjusted for age at injury, gender, years of work experience, employment status, and state

Categories listed as Not Otherwise Classified (NOC) are not included here

**Table S2: Log-gamma regression models estimating the mean payments and burden associated with specific source of injury categories for those claims that resulted in a payment, stratified by medical, and death and disability claims**

| Source of injury                   | Medical claims    |              |       |                  | Disability and death related claims |                |       |                   |
|------------------------------------|-------------------|--------------|-------|------------------|-------------------------------------|----------------|-------|-------------------|
|                                    | Mean payment (\$) | 95% CI (\$)  | n     | Burden (\$)      | Mean payment (\$)                   | 95% CI (\$)    | n     | Burden (\$)       |
| Cut/Puncture/Scrape-Object Being   |                   |              |       |                  |                                     |                |       |                   |
| Lifted or Handled                  | 588               | (556, 622)   | 5,782 | <b>3,398,988</b> | 2,374                               | (1838, 3,065)  | 266   | 631,378           |
| Fall/Slip-From Liquid or Grease    |                   |              | 5,353 |                  |                                     |                | 219   |                   |
| Spills                             | 1,019             | (832, 1,249) |       | <b>5,456,670</b> | 5,113                               | (3,638, 7,186) |       | 1,119,785         |
| Fall/Slip-On Ice or Snow           | 997               | (778, 1,277) | 7,815 | <b>7,790,262</b> | 3,852                               | (2,782, 5,332) | 218   | 839,691           |
| Fall/Slip-On Same Level            | 800               | (732, 875)   | 1,333 | 1,066,686        | 4,888                               | (4,033, 5,925) | 1,065 | <b>5,205,510</b>  |
| Motor Vehicle-Collision with other |                   |              | 6,981 |                  |                                     |                | 401   |                   |
| Vehicle                            | 945               | (849, 1,051) |       | <b>6,593,884</b> | 4,770                               | (3,258, 6,984) |       | 1,912,631         |
| Strain/Injury By-Lifting           | 885               | (835, 938)   | 2,047 | 1,811,527        | 4,661                               | (4,069, 5,338) | 2,475 | <b>11,535,490</b> |
